# Supplementary material for: Effect of Deashing Treatment on Ash Fusion Characteristics of Biochar from Bamboo Shoot Shells
Source: MDPI journal article supplement (doi:10.3390/molecules29061400), 2024-03-21
Supplement: s1 [file s1]

## Supplement materials

# Effect of Deashing Treatment on Ash Fusion Characteristics of Biochar from Bamboo Shoot Shells

Hao Ren <sup>1,2</sup>, Qi Gao <sup>1,2</sup>, Liangmeng Ni <sup>1,2</sup>, Mengfu Su <sup>1,2</sup>, Shaowen Rong <sup>1,2</sup>, Shushu Liu <sup>1,2</sup>, Yanhang Zhong <sup>1,2</sup> and Zhijia Liu <sup>1,2,\*</sup>

<sup>1</sup> International Centre for Bamboo and Rattan, Beijing 100102, China;  
hao991105@163.com (H.R.); gaoqi677@163.com (Q.G.); 17346610822@163.com (L.N.); smf13850202763@163.com (M.S.);  
bramble\_001@163.com (S.R.); ls2535075602@163.com (S.L.);  
zyh1842675310@gmail.com (Y.Z.)

<sup>2</sup> Key Laboratory of National Forestry and Grassland Administration/Beijing for Bamboo & Rattan Science and Technology, Beijing 100102, China

\* Correspondence: liuzj@icbr.ac.cn

**Table S1** BBSS mass difference with different deashing treatments

|         | Mass before deashing | Mass after deashing | Mass difference |
|---------|----------------------|---------------------|-----------------|
|         | (g)                  | (g)                 | (g)             |
| BBSS-WA | 10                   | 8.857               | 1.143           |
| BBSS-AW | 10                   | 8.983               | 1.017           |

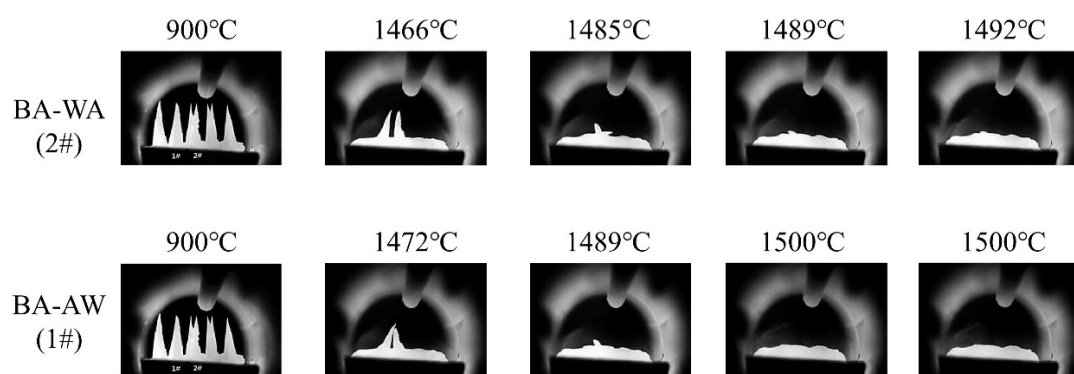

**Figure S1.** Ash fusion temperature of BA-WA and BA-AW.

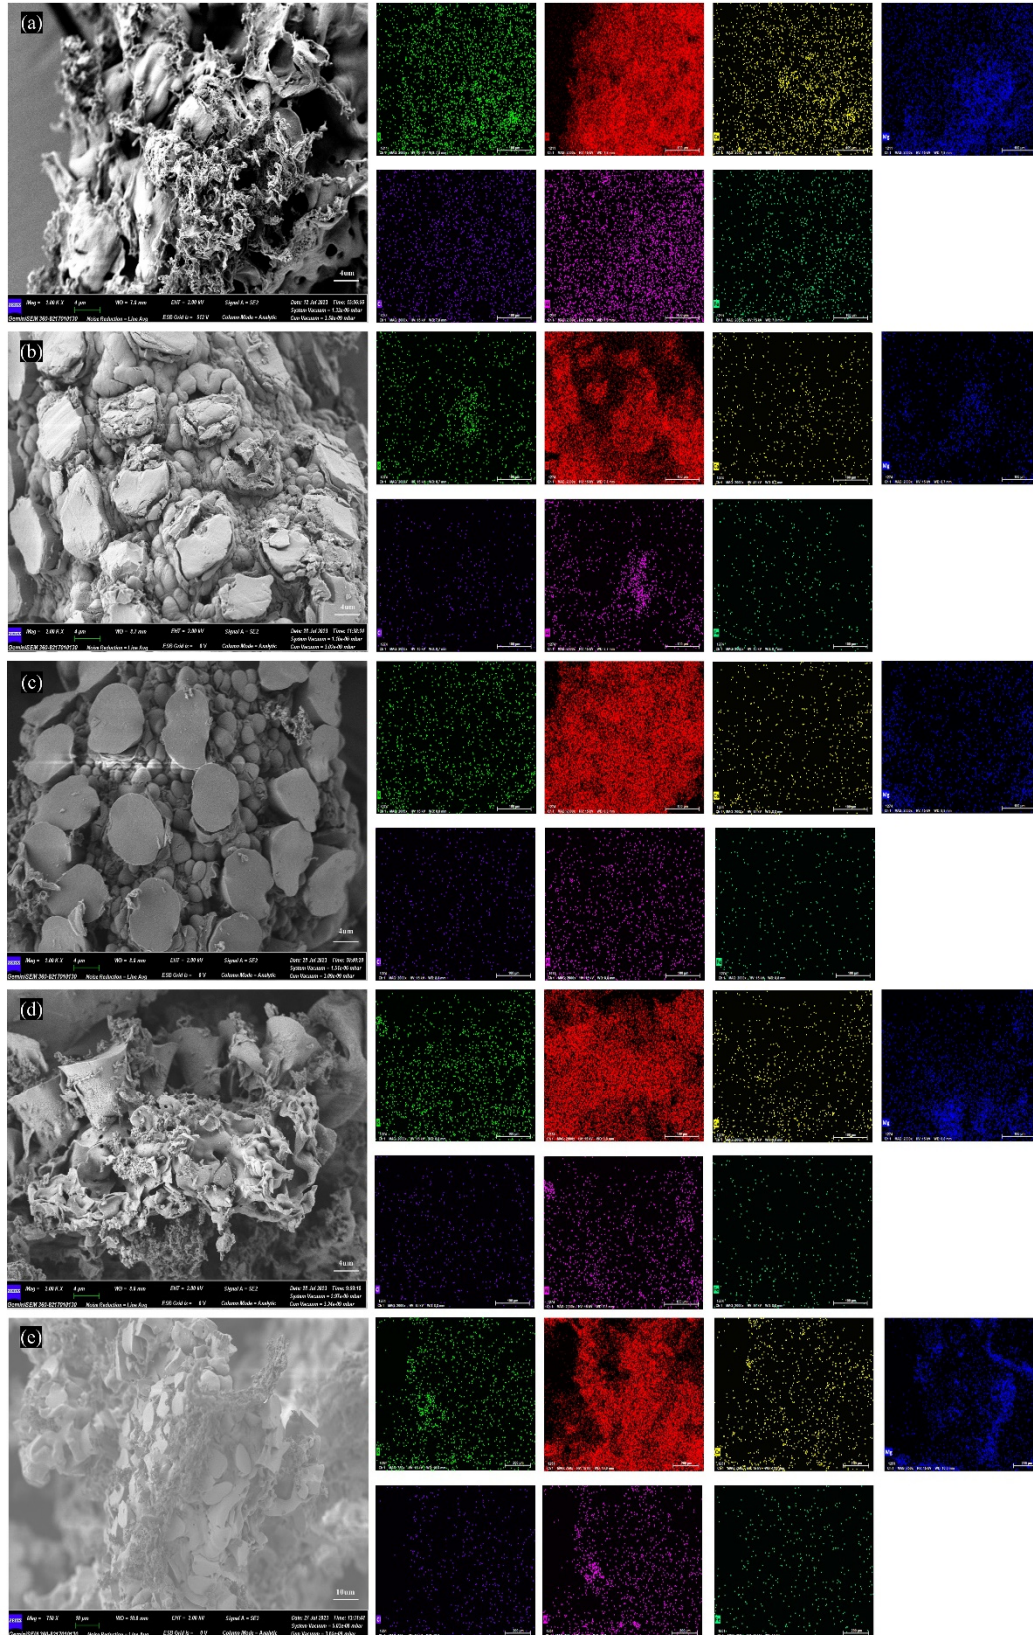

**Figure S2.** SEM-EDS images of BA-WA at different temperatures.



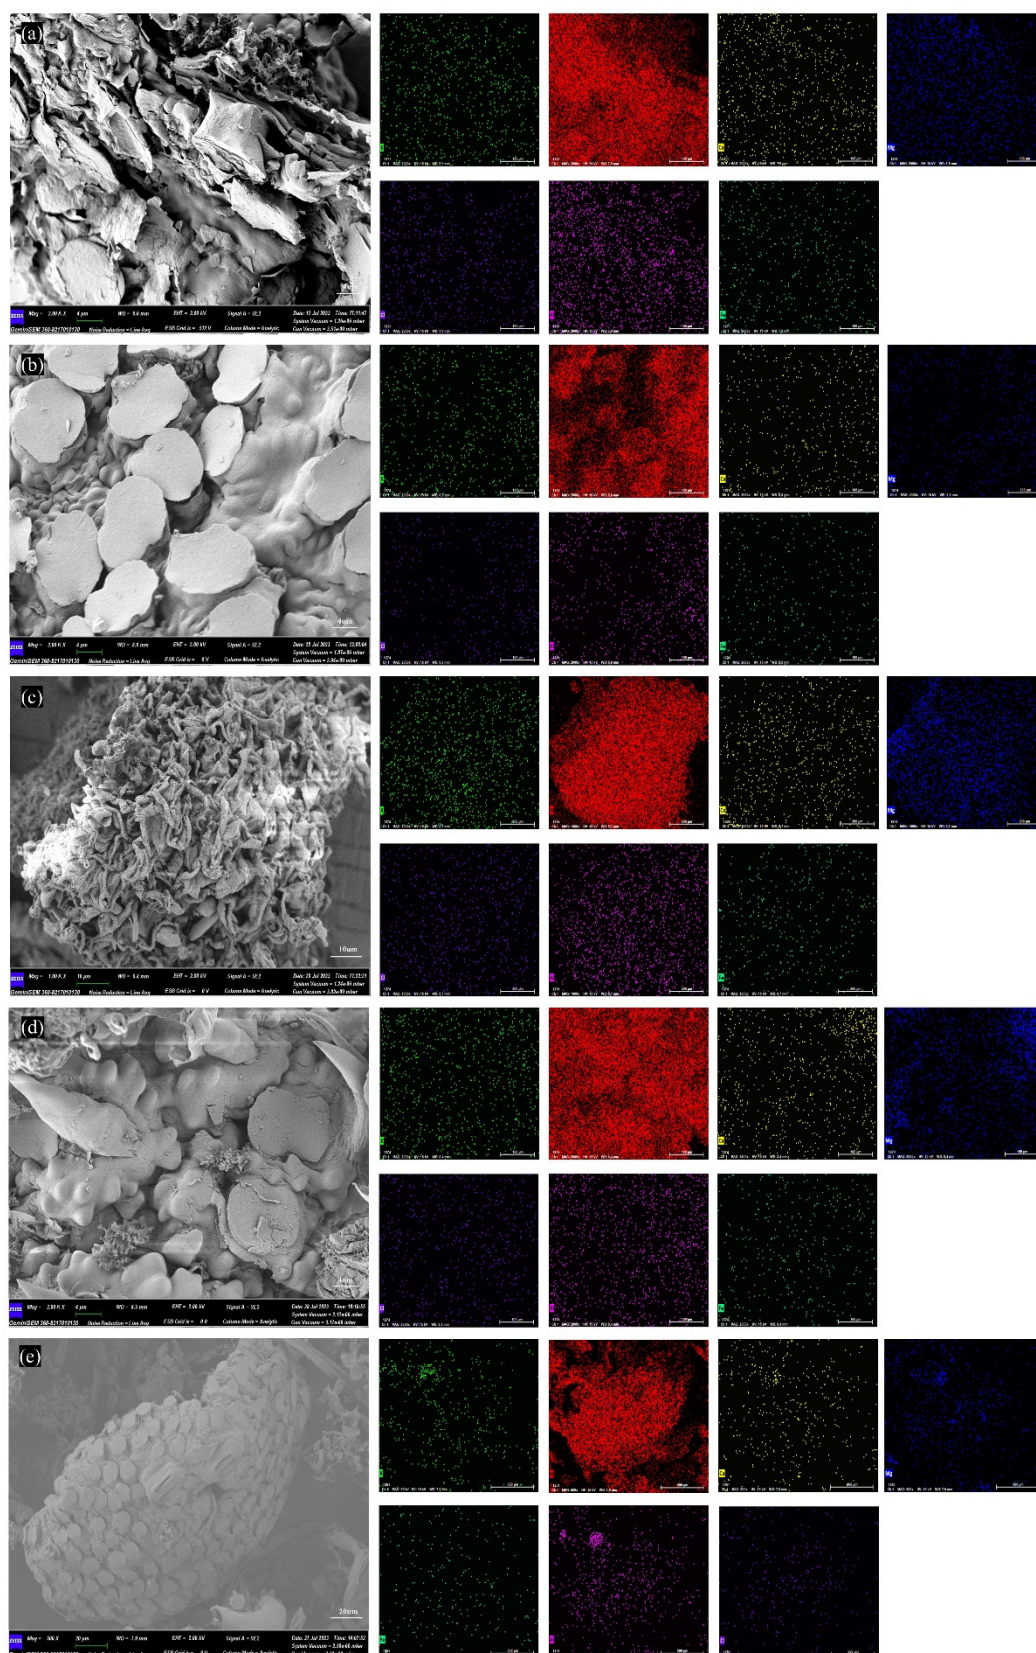

**Figure S3.** SEM-EDS images of BA-AW at different temperatures.
